# Supplementary material for: Seed bank and growth comparisons of native (Virgilia divaricata) and invasive alien (Acacia mearnsii and A. melanoxylon) plants: implications for conservation
Source: PeerJ. 2018 Aug 21;6:e5466. doi: 10.7717/peerj.5466 (PMC6108313; doi:10.7717/peerj.5466)
Supplement: Data S1 [file peerj-06-5466-s003.xlsx]

## Sheet: Seed bank
Tree number	Species	Depth	Seed_count	Seed/m^2
1	Acacia mearnsii	Litter	8	104.8
1	Acacia mearnsii	Shallow	90	1179
1	Acacia mearnsii	Deep	27	353.7
2	Acacia mearnsii	Litter	14	183.4
2	Acacia mearnsii	Shallow	4	52.4
2	Acacia mearnsii	Deep	6	78.6
3	Acacia mearnsii	Litter	1432	18759.2
3	Acacia mearnsii	Shallow	497	6510.7
3	Acacia mearnsii	Deep	162	2122.2
4	Acacia mearnsii	Litter	338	4427.8
4	Acacia mearnsii	Shallow	533	6982.3
4	Acacia mearnsii	Deep	645	8449.5
5	Acacia mearnsii	Litter	2781	36431.1
5	Acacia mearnsii	Shallow	2962	38802.2
5	Acacia mearnsii	Deep	2286	29946.6
6	Acacia mearnsii	Litter	309	4047.9
6	Acacia mearnsii	Shallow	674	8829.4
6	Acacia mearnsii	Deep	408	5344.8
7	Acacia mearnsii	Litter	77	1008.7
7	Acacia mearnsii	Shallow	438	5737.8
7	Acacia mearnsii	Deep	417	5462.7
8	Acacia mearnsii	Litter	187	2449.7
8	Acacia mearnsii	Shallow	566	7414.6
8	Acacia mearnsii	Deep	843	11043.3
9	Acacia mearnsii	Litter	207	2711.7
9	Acacia mearnsii	Shallow	614	8043.4
9	Acacia mearnsii	Deep	858	11239.8
10	Acacia mearnsii	Litter	1	13.1
10	Acacia mearnsii	Shallow	3	39.3
10	Acacia mearnsii	Deep	9	117.9
11	Acacia melanoxylon	Litter	0	0
11	Acacia melanoxylon	Shallow	25	327.5
11	Acacia melanoxylon	Deep	9	117.9
12	Acacia melanoxylon	Litter	2	26.2
12	Acacia melanoxylon	Shallow	0	0
12	Acacia melanoxylon	Deep	0	0
13	Acacia melanoxylon	Litter	32	419.2
13	Acacia melanoxylon	Shallow	43	563.3
13	Acacia melanoxylon	Deep	33	432.3
14	Acacia melanoxylon	Litter	0	0
14	Acacia melanoxylon	Shallow	0	0
14	Acacia melanoxylon	Deep	3	39.3
15	Acacia melanoxylon	Litter	0	0
15	Acacia melanoxylon	Shallow	3	39.3
15	Acacia melanoxylon	Deep	3	39.3
16	Acacia melanoxylon	Litter	6	78.6
16	Acacia melanoxylon	Shallow	32	419.2
16	Acacia melanoxylon	Deep	66	864.6
17	Acacia melanoxylon	Litter	2	26.2
17	Acacia melanoxylon	Shallow	25	327.5
17	Acacia melanoxylon	Deep	27	353.7
18	Acacia melanoxylon	Litter	0	0
18	Acacia melanoxylon	Shallow	0	0
18	Acacia melanoxylon	Deep	0	0
19	Acacia melanoxylon	Litter	2	26.2
19	Acacia melanoxylon	Shallow	11	144.1
19	Acacia melanoxylon	Deep	15	196.5
20	Acacia melanoxylon	Litter	17	222.7
20	Acacia melanoxylon	Shallow	176	2305.6
20	Acacia melanoxylon	Deep	96	1257.6
21	Virgilia divaricata	Litter	7	91.7
21	Virgilia divaricata	Shallow	28	366.8
21	Virgilia divaricata	Deep	6	78.6
22	Virgilia divaricata	Litter	119	1558.9
22	Virgilia divaricata	Shallow	106	1388.6
22	Virgilia divaricata	Deep	12	157.2
23	Virgilia divaricata	Litter	166	2174.6
23	Virgilia divaricata	Shallow	362	4742.2
23	Virgilia divaricata	Deep	252	3301.2
24	Virgilia divaricata	Litter	15	196.5
24	Virgilia divaricata	Shallow	30	393
24	Virgilia divaricata	Deep	27	353.7
25	Virgilia divaricata	Litter	85	1113.5
25	Virgilia divaricata	Shallow	63	825.3
25	Virgilia divaricata	Deep	39	510.9
26	Virgilia divaricata	Litter	96	1257.6
26	Virgilia divaricata	Shallow	181	2371.1
26	Virgilia divaricata	Deep	168	2200.8
27	Virgilia divaricata	Litter	7	91.7
27	Virgilia divaricata	Shallow	11	144.1
27	Virgilia divaricata	Deep	21	275.1
28	Virgilia divaricata	Litter	14	183.4
28	Virgilia divaricata	Shallow	63	825.3
28	Virgilia divaricata	Deep	51	668.1
29	Virgilia divaricata	Litter	11	144.1
29	Virgilia divaricata	Shallow	17	222.7
29	Virgilia divaricata	Deep	24	314.4
30	Virgilia divaricata	Litter	75	982.5
30	Virgilia divaricata	Shallow	46	602.6
30	Virgilia divaricata	Deep	45	589.5

## Sheet: Viability
Species	Depth	Habitat	Seed available	Seed used	Viable	Percentage
Acacia mearnsii	Litter	Disturbed	4522	25	24	96
Acacia mearnsii	Litter	Ecotone	264	25	23	92
Acacia mearnsii	Litter	Forest	346	25	24	96
Acacia mearnsii	Litter	Fynbos	222	25	20	80
Acacia mearnsii	Shallow	Disturbed	4133	25	23	92
Acacia mearnsii	Shallow	Ecotone	1004	25	25	100
Acacia mearnsii	Shallow	Forest	623	25	24	96
Acacia mearnsii	Shallow	Fynbos	621	25	20	80
Acacia mearnsii	Deep	Disturbed	952	25	23	92
Acacia mearnsii	Deep	Ecotone	420	25	24	96
Acacia mearnsii	Deep	Forest	224	25	22	88
Acacia mearnsii	Deep	Fynbos	291	25	21	84
Virgilia divaricata	Litter	Disturbed	285	25	20	80
Virgilia divaricata	Litter	Ecotone	96	25	25	100
Virgilia divaricata	Litter	Forest	29	25	24	96
Virgilia divaricata	Litter	Fynbos	185	25	23	92
Virgilia divaricata	Shallow	Disturbed	468	25	21	84
Virgilia divaricata	Shallow	Ecotone	181	25	24	96
Virgilia divaricata	Shallow	Forest	93	25	23	92
Virgilia divaricata	Shallow	Fynbos	165	25	22	88
Virgilia divaricata	Deep	Disturbed	88	25	20	80
Virgilia divaricata	Deep	Ecotone	56	25	24	96
Virgilia divaricata	Deep	Forest	26	25	21	84
Virgilia divaricata	Deep	Fynbos	45	25	17	68
Acacia melanoxylon	Litter	Disturbed	53	14	11	78.5714
Acacia melanoxylon	Litter	Forest	6	3	3	100
Acacia melanoxylon	Shallow	Disturbed	258	50	50	100
Acacia melanoxylon	Shallow	Forest	57	49	47	95.9184
Acacia melanoxylon	Deep	Disturbed	58	42	35	83.3333
Acacia melanoxylon	Deep	Forest	25	25	20	80

## Sheet: Competition
Tree #	Species	GLD_T1	GLD_T2	Height_T1	Height_T2
1	Virgilia divaricata	0.885	1.185	80	200
1	Acacia mearnsii	1.685	2.01	270	400
1	Acacia mearnsii	3.84	4.515	450	610
1	Acacia mearnsii	0.88	1.29	110	220
1	Acacia mearnsii	0.845	1.19	150	250
1	Acacia mearnsii	2.515	3.015	370	550
1	Acacia mearnsii	2.27	3.025	330	510
1	Acacia mearnsii	0.785	0.91	130	170
1	Acacia mearnsii	1.58	2.295	230	470
1	Acacia mearnsii	0.915	1.09	120	190
1	Acacia mearnsii	2.715	3.535	360	510
1	Acacia mearnsii	1.14	1.515	240	310
1	Acacia mearnsii	1.5	1.7	210	300
1	Acacia mearnsii	2.44	3.27	330	480
1	Acacia mearnsii	0.475	0.715	60	130
1	Acacia mearnsii	0.73	0.915	120	160
1	Acacia mearnsii	0.73	1.105	130	200
1	Acacia mearnsii	0.415	0.55	80	130
1	Acacia mearnsii	0.425	0.55	70	120
1	Acacia mearnsii	0.565	0.595	70	130
2	Virgilia divaricata	3.48	4.84	300	500
2	Acacia mearnsii	1.685	2.01	270	400
2	Acacia mearnsii	3.84	4.515	450	610
2	Acacia mearnsii	2.44	3.27	330	480
2	Acacia mearnsii	0.615	0.85	110	170
2	Acacia mearnsii	1.1	1.48	200	380
2	Acacia mearnsii	2.68	3.82	380	610
2	Acacia mearnsii	0.9	1.11	180	240
2	Acacia mearnsii	2.015	2.895	300	500
2	Acacia mearnsii	0.79	1.115	130	210
2	Acacia mearnsii	0.73	1.06	140	200
2	Acacia mearnsii	0.87	1.305	120	220
2	Acacia mearnsii	2.11	2.655	270	410
2	Acacia mearnsii	2.735	3.625	330	540
2	Acacia mearnsii	0.94	1.22	170	250
2	Acacia mearnsii	1.255	1.765	210	300
2	Acacia mearnsii	1.305	1.605	220	320
2	Acacia mearnsii	0.825	1.04	130	200
2	Acacia mearnsii	0.8	1.175	150	220
2	Acacia mearnsii	0.765	0.875	130	170
2	Acacia mearnsii	1.345	1.87	230	370
2	Acacia mearnsii	1.4	1.85	230	400
2	Acacia mearnsii	2.785	3.165	360	500
2	Acacia mearnsii	1.445	1.875	300	420
2	Acacia mearnsii	1.31	1.775	270	370
2	Acacia mearnsii	2.24	3.135	340	540
3	Virgilia divaricata	6.5	7.565	510	670
3	Acacia mearnsii	0.725	0.85	120	200
3	Acacia mearnsii	1.8	1.98	260	330
3	Acacia mearnsii	1.045	1.325	210	310
3	Acacia mearnsii	1.685	1.915	250	350
3	Acacia mearnsii	2.64	3.16	380	480
3	Acacia mearnsii	0.6	0.775	140	160
3	Acacia mearnsii	1.14	1.49	220	300
3	Acacia mearnsii	1.26	1.58	220	280
3	Acacia mearnsii	3.8	4.67	420	610
4	Virgilia divaricata	4.49	5.96	380	600
4	Acacia mearnsii	0.55	0.66	120	150
4	Acacia mearnsii	0.96	1.025	150	180
4	Acacia mearnsii	2.765	3.49	370	600
4	Acacia mearnsii	0.435	0.505	80	100
4	Acacia mearnsii	3.615	5.14	450	680
4	Acacia mearnsii	0.76	0.86	130	170
4	Acacia mearnsii	2.16	2.67	350	520
4	Acacia mearnsii	1	1.17	210	260
4	Acacia mearnsii	1.46	1.795	230	350
4	Acacia mearnsii	0.46	0.58	100	140
4	Acacia mearnsii	3.415	4.39	410	630
5	Virgilia divaricata	4.83	6.295	360	600
5	Acacia mearnsii	1.055	1.4	190	250
5	Acacia mearnsii	1.5	1.75	230	290
5	Acacia mearnsii	0.515	0.64	70	110
5	Acacia mearnsii	1.79	2.22	270	370
5	Acacia mearnsii	1.32	1.515	220	300
5	Acacia mearnsii	0.54	0.575	110	120
5	Acacia mearnsii	3.185	4.55	430	630
5	Acacia mearnsii	0.915	1.075	140	190
5	Acacia mearnsii	1.32	1.62	240	320
5	Acacia mearnsii	2.58	3.42	370	580
6	Virgilia divaricata	2.46	3.23	250	350
6	Acacia mearnsii	1.92	2.585	260	350
6	Acacia mearnsii	1.455	1.875	250	340
6	Acacia mearnsii	1.915	2.405	300	410
6	Acacia mearnsii	1.47	2.05	230	310
6	Acacia mearnsii	0.745	0.98	130	180
6	Acacia mearnsii	0.84	1.095	140	190
6	Acacia mearnsii	0.715	0.785	100	150
6	Acacia mearnsii	1.02	1.425	170	250
6	Acacia mearnsii	0.715	0.815	120	150
6	Acacia mearnsii	0.61	0.685	80	110
6	Acacia mearnsii	0.96	1.03	150	170
6	Acacia mearnsii	0.66	0.985	130	180
6	Acacia mearnsii	0.4	0.58	90	110
6	Acacia mearnsii	0.66	0.83	80	110
6	Acacia mearnsii	1.57	1.9	260	350
6	Acacia mearnsii	0.96	1.19	180	260
6	Acacia mearnsii	2.44	3.375	360	450
6	Acacia mearnsii	0.455	0.54	60	80
6	Acacia mearnsii	0.515	0.695	100	140
6	Acacia mearnsii	0.54	0.68	90	120
6	Acacia mearnsii	0.565	0.83	80	160
6	Acacia mearnsii	0.635	0.71	100	100
6	Acacia mearnsii	0.32	0.42	50	80
6	Acacia mearnsii	0.46	0.67	60	100
6	Acacia mearnsii	0.305	0.405	50	60
6	Acacia mearnsii	0.365	0.37	60	70
6	Acacia mearnsii	1.125	1.155	180	220
6	Acacia mearnsii	1.3	1.72	270	340
6	Acacia mearnsii	1.22	1.36	220	250
6	Acacia mearnsii	1.24	1.69	220	340
6	Acacia mearnsii	1.715	2.25	230	330
6	Acacia mearnsii	2.41	3.28	340	450
6	Acacia mearnsii	1.875	2.23	260	340
6	Acacia mearnsii	1.05	1.36	190	250
6	Acacia mearnsii	0.615	0.745	130	160
6	Acacia mearnsii	1.445	1.605	210	280
6	Acacia mearnsii	1.8	2.32	250	330
6	Acacia mearnsii	0.775	0.965	130	170
6	Acacia mearnsii	0.985	1.215	170	210
6	Acacia mearnsii	0.79	1.07	140	210
6	Acacia melanoxylon	2.3	2.57	250	280
6	Acacia melanoxylon	0.52	0.65	100	110
6	Acacia melanoxylon	0.5	0.635	60	70
7	Virgilia divaricata	1.565	1.74	210	260
7	Acacia mearnsii	1.02	1.055	160	190
7	Acacia mearnsii	1.3	1.79	240	320
7	Acacia mearnsii	1.965	2.305	270	380
7	Acacia mearnsii	2.365	2.965	360	490
7	Acacia mearnsii	2.46	3.515	340	510
7	Acacia mearnsii	0.89	0.92	130	140
7	Acacia mearnsii	1.135	1.17	200	270
7	Acacia mearnsii	1.54	1.93	340	480
7	Acacia mearnsii	0.94	1.11	200	250
7	Acacia mearnsii	1.485	1.66	220	260
7	Acacia mearnsii	2.315	2.79	310	430
7	Acacia mearnsii	0.835	0.84	100	110
7	Acacia mearnsii	2.66	3.8	420	530
7	Acacia mearnsii	3.16	3.97	370	530
7	Acacia mearnsii	0.63	0.71	60	80
7	Acacia mearnsii	1.63	2.015	160	340
7	Acacia mearnsii	1.76	2.13	260	370
7	Acacia melanoxylon	0.525	0.545	100	110
7	Acacia melanoxylon	0.805	0.88	70	100
7	Acacia melanoxylon	0.9	0.93	70	140
7	Acacia melanoxylon	0.305	0.44	70	90
7	Acacia melanoxylon	0.6	0.665	80	120
7	Acacia melanoxylon	0.365	0.455	50	50
7	Virgilia divaricata	0.825	0.995	90	150
8	Virgilia divaricata	4.32	5.195	400	490
8	Acacia mearnsii	2.46	3.515	340	510
8	Acacia mearnsii	0.89	0.92	130	140
8	Acacia mearnsii	1.135	1.17	200	270
8	Acacia mearnsii	0.94	1.11	200	250
8	Acacia mearnsii	0.66	0.85	150	180
8	Acacia mearnsii	0.57	0.62	110	150
8	Acacia mearnsii	0.5	0.58	90	100
8	Acacia mearnsii	0.89	1.11	150	190
8	Acacia mearnsii	0.71	0.915	130	150
8	Acacia mearnsii	1.23	1.615	200	270
8	Acacia mearnsii	3	3.505	330	470
8	Acacia mearnsii	1.29	1.575	220	310
8	Acacia mearnsii	1	1.175	140	230
8	Acacia mearnsii	2.07	2.505	340	480
8	Acacia mearnsii	1.075	1.33	200	260
8	Acacia mearnsii	2.16	2.735	320	440
8	Acacia mearnsii	3.16	3.43	390	540
8	Acacia mearnsii	1.2	1.39	220	260
8	Acacia mearnsii	0.765	0.86	150	180
8	Acacia mearnsii	2.485	3.025	340	480
8	Acacia mearnsii	0.57	0.595	90	100
8	Acacia mearnsii	1.04	1.345	180	260
8	Acacia mearnsii	0.405	0.55	80	110
8	Acacia mearnsii	0.915	1.17	190	240
8	Acacia mearnsii	1.005	1.2	170	230
8	Acacia mearnsii	1.63	2.19	310	430
8	Acacia mearnsii	2.79	3.08	370	500
8	Acacia mearnsii	3	4.16	450	580
8	Acacia mearnsii	2.355	2.72	360	460
8	Acacia mearnsii	1.025	1.065	170	210
8	Acacia mearnsii	0.93	0.935	130	150
8	Acacia mearnsii	0.775	0.94	160	180
8	Acacia mearnsii	2.36	2.74	310	450
8	Acacia mearnsii	1.3	1.4	220	260
8	Acacia mearnsii	0.79	0.845	190	210
8	Acacia mearnsii	0.8	0.955	140	190
8	Acacia mearnsii	1.985	2.6	290	420
8	Acacia mearnsii	1.135	1.545	220	260
8	Acacia mearnsii	1.175	1.41	220	270
8	Acacia mearnsii	1.265	1.52	220	300
8	Acacia mearnsii	0.87	0.87	120	150
8	Acacia mearnsii	1.38	1.58	190	260
8	Acacia mearnsii	0.565	0.575	80	100
8	Acacia mearnsii	2.06	2.53	300	420
8	Acacia mearnsii	1.56	1.955	280	360
8	Acacia mearnsii	1.1	1.455	280	360
8	Acacia melanoxylon	0.45	0.59	90	120
8	Acacia melanoxylon	0.455	0.495	50	50
8	Virgilia divaricata	0.825	2.035	210	310
9	Virgilia divaricata	2.24	2.745	270	360
9	Acacia mearnsii	3.57	3.8	500	600
9	Acacia mearnsii	1.46	1.825	230	310
9	Acacia mearnsii	1.345	1.965	230	310
9	Acacia mearnsii	1.14	1.54	200	270
9	Acacia mearnsii	1.01	1.26	180	260
9	Acacia mearnsii	0.58	0.64	110	140
9	Acacia mearnsii	0.725	0.92	150	240
9	Acacia mearnsii	1.09	1.275	210	260
9	Acacia mearnsii	1.2	1.525	230	310
9	Acacia mearnsii	0.685	0.73	110	150
9	Acacia mearnsii	0.56	0.7	100	150
9	Acacia mearnsii	0.52	0.635	80	130
9	Acacia mearnsii	0.4	0.425	60	80
9	Acacia mearnsii	0.435	0.525	100	150
9	Acacia mearnsii	1.815	2.17	250	360
9	Acacia mearnsii	1.26	1.74	220	300
9	Acacia mearnsii	1.715	2.095	240	370
9	Acacia mearnsii	0.885	0.965	140	150
9	Acacia mearnsii	0.915	1.095	160	200
9	Acacia mearnsii	1.805	2.14	230	330
9	Acacia mearnsii	0.875	1.13	170	220
9	Acacia mearnsii	1.22	1.26	200	270
9	Acacia mearnsii	0.7	0.88	160	190
9	Acacia mearnsii	0.79	0.94	150	180
9	Acacia mearnsii	0.58	0.67	100	120
9	Acacia mearnsii	1.305	1.54	240	310
9	Acacia mearnsii	0.715	0.82	150	180
9	Acacia mearnsii	1.05	1.225	200	250
9	Acacia mearnsii	2.045	2.25	340	410
9	Acacia mearnsii	1.105	1.24	230	270
9	Acacia mearnsii	2.4	2.635	360	470
9	Acacia mearnsii	1.585	1.715	300	380
9	Acacia mearnsii	2.785	3.475	400	480
9	Acacia mearnsii	2.505	2.985	380	470
9	Acacia mearnsii	1.17	1.34	180	230
9	Acacia mearnsii	0.83	1.12	200	240
9	Acacia mearnsii	2.065	2.685	320	420
9	Acacia mearnsii	0.715	0.855	150	180
9	Acacia mearnsii	0.715	0.85	160	200
9	Acacia mearnsii	1.26	1.68	240	320
9	Acacia mearnsii	0.815	1.095	150	190
9	Virgilia divaricata	1.685	1.815	170	260
10	Virgilia divaricata	1.695	2.37	240	360
10	Acacia mearnsii	0.69	0.73	100	180
10	Acacia mearnsii	1.155	1.3	180	260
10	Acacia mearnsii	0.625	0.73	70	90
10	Acacia mearnsii	0.9	1.08	190	250
10	Acacia mearnsii	4.075	4.675	40	650
11	Virgilia divaricata	6.94	9.7	720	750
11	Acacia mearnsii	0.51	0.63	90	130
11	Acacia mearnsii	3.09	4.26	560	750
11	Acacia mearnsii	0.8	0.96	160	210
11	Acacia mearnsii	0.715	0.76	140	170
11	Acacia mearnsii	1.3	1.385	230	310
11	Acacia mearnsii	0.555	0.755	130	170
11	Acacia mearnsii	0.645	0.81	130	180
11	Acacia mearnsii	0.665	0.735	130	160
11	Acacia mearnsii	0.595	0.775	140	180
11	Acacia mearnsii	2.585	3.17	450	540
11	Acacia mearnsii	0.315	0.44	80	110
11	Acacia mearnsii	1.035	1.12	240	270
11	Acacia mearnsii	2.055	2.595	390	540
11	Acacia mearnsii	0.335	0.69	120	150
11	Acacia mearnsii	2.22	2.79	380	520
11	Acacia mearnsii	1.12	1.31	270	340
11	Acacia mearnsii	0.38	0.5	90	110
11	Acacia mearnsii	2.27	2.615	420	600
11	Acacia mearnsii	0.54	0.77	110	140
11	Acacia mearnsii	0.505	0.62	100	130
12	Virgilia divaricata	0.77	1.16	110	170
12	Acacia mearnsii	2.48	3.705	480	690
12	Acacia mearnsii	0.73	0.795	90	140
12	Acacia mearnsii	0.405	0.605	70	140
12	Acacia mearnsii	0.27	0.36	50	70
12	Acacia mearnsii	0.94	1.35	150	240
12	Acacia mearnsii	0.62	0.795	100	200
12	Acacia mearnsii	1.48	2.43	210	400
13	Virgilia divaricata	5.795	6.215	490	620
13	Acacia mearnsii	0.395	0.495	60	70
13	Acacia mearnsii	2.185	2.665	290	450
13	Acacia mearnsii	1.74	1.94	280	380
13	Acacia mearnsii	0.63	0.71	120	140
13	Acacia mearnsii	1.48	2.135	220	300
13	Acacia melanoxylon	0.915	1.205	140	210
13	Acacia melanoxylon	1.1	1.17	110	160
13	Acacia melanoxylon	0.735	0.83	90	130
13	Acacia melanoxylon	0.8	1.65	130	200
13	Acacia melanoxylon	1.645	1.705	150	220
14	Virgilia divaricata	1.79	2.36	200	280
14	Acacia mearnsii	0.66	0.855	110	140
14	Acacia mearnsii	2.375	2.89	430	590
14	Acacia mearnsii	0.55	0.75	120	180
14	Acacia mearnsii	0.495	0.62	90	120
14	Acacia mearnsii	0.54	0.635	90	110
14	Acacia mearnsii	0.505	0.675	100	130
14	Acacia mearnsii	1.75	1.87	210	240
14	Acacia mearnsii	0.86	1.06	150	180
14	Acacia mearnsii	2.355	2.675	50	530
14	Acacia mearnsii	3.465	4.35	530	640
14	Acacia mearnsii	1.055	1.375	240	310
14	Acacia mearnsii	1.08	1.24	210	270
14	Acacia melanoxylon	1.455	1.535	190	270
14	Acacia melanoxylon	0.685	0.875	140	160
14	Acacia melanoxylon	0.31	0.42	60	70
14	Acacia melanoxylon	1.345	1.47	70	220
14	Acacia melanoxylon	0.77	0.98	110	140
15	Virgilia divaricata	3.375	4.12	330	460
15	Acacia mearnsii	2.72	3.315	350	470
15	Acacia mearnsii	0.41	0.675	90	100
15	Acacia mearnsii	2.4	3.105	410	650
15	Acacia mearnsii	0.8	1.03	170	220
15	Acacia mearnsii	0.41	0.475	60	80
15	Acacia mearnsii	1.075	1.125	150	210
15	Acacia mearnsii	0.9	1.045	160	210
15	Acacia mearnsii	0.745	1	120	190
15	Acacia mearnsii	0.75	0.81	110	130
15	Acacia melanoxylon	0.26	0.51	60	80
15	Acacia melanoxylon	2.72	3.31	370	490
15	Acacia melanoxylon	0.995	1.31	140	170
15	Acacia melanoxylon	0.86	0.99	120	130
15	Acacia melanoxylon	1.18	1.565	130	170
15	Acacia melanoxylon	0.91	1.355	160	200
16	Virgilia divaricata	3.61	3.835	400	490
16	Acacia mearnsii	2.47	2.945	410	510
16	Acacia mearnsii	1.155	1.445	300	350
16	Acacia mearnsii	2.48	3.085	480	560
16	Acacia mearnsii	0.91	1.405	230	250
16	Acacia mearnsii	1.67	1.78	290	360
16	Acacia mearnsii	0.485	0.565	130	140
16	Acacia mearnsii	1.925	2.175	370	450
16	Acacia mearnsii	2.84	3.675	460	570
16	Acacia mearnsii	0.81	1.055	190	230
16	Acacia mearnsii	0.75	0.96	160	200
16	Acacia mearnsii	3.14	3.54	480	600
16	Acacia mearnsii	0.955	1.22	190	230
16	Acacia mearnsii	2.15	2.715	410	480
16	Acacia melanoxylon	1.75	1.91	230	250
16	Acacia melanoxylon	1.01	1.475	180	210
17	Virgilia divaricata	1.415	1.76	250	340
17	Acacia mearnsii	2.94	3.69	480	610
17	Acacia mearnsii	1.085	1.25	250	310
17	Acacia mearnsii	0.465	0.53	80	90
17	Acacia mearnsii	0.63	0.7	110	130
17	Acacia mearnsii	2.2	2.49	410	470
17	Acacia mearnsii	2.545	3.16	450	550
17	Acacia mearnsii	0.565	0.6	110	130
17	Acacia mearnsii	0.44	0.49	80	100
17	Acacia mearnsii	0.565	0.585	110	120
17	Acacia mearnsii	0.78	0.885	130	150
17	Acacia mearnsii	2	2.505	410	460
17	Acacia mearnsii	0.585	0.625	90	100
17	Acacia mearnsii	1.645	1.825	320	400
17	Acacia mearnsii	1.045	1.17	210	250
17	Acacia mearnsii	2.05	2.14	300	360
17	Acacia mearnsii	0.745	0.85	200	250
17	Acacia mearnsii	2.785	3.44	490	630
17	Acacia mearnsii	1.25	1.415	250	330
17	Acacia mearnsii	0.6	0.73	120	150
17	Acacia mearnsii	0.58	0.72	120	140
17	Acacia mearnsii	7.355	7.81	610	800
17	Acacia mearnsii	1.355	1.57	240	280
17	Acacia mearnsii	1.69	2.015	320	400
17	Acacia mearnsii	2.2	2.96	390	500
17	Acacia mearnsii	1.53	1.86	340	440
17	Acacia melanoxylon	0.645	0.75	110	120
17	Acacia melanoxylon	0.635	0.73	110	130
18	Virgilia divaricata	3.39	4.415	470	530
18	Acacia mearnsii	0.435	0.52	80	110
18	Acacia mearnsii	0.7	0.85	150	190
18	Acacia mearnsii	1.13	1.24	270	300
18	Acacia mearnsii	0.68	0.7	180	190
18	Acacia mearnsii	1.88	2.135	320	400
18	Acacia mearnsii	0.8	0.94	180	200
18	Acacia mearnsii	0.835	0.965	160	180
18	Acacia mearnsii	1.64	2.01	320	410
18	Acacia mearnsii	0.59	0.635	140	150
18	Acacia mearnsii	1.22	1.455	250	310
18	Acacia mearnsii	3.46	4.49	540	750
18	Acacia mearnsii	0.54	0.6	80	100
18	Acacia mearnsii	1.515	1.85	280	350
18	Acacia mearnsii	1.365	1.665	290	380
18	Acacia mearnsii	1.325	1.52	250	280
18	Acacia mearnsii	1.335	1.51	260	300
18	Acacia mearnsii	2.235	2.68	360	510
18	Acacia mearnsii	0.615	0.77	160	200
18	Acacia mearnsii	0.66	0.78	160	200
18	Acacia melanoxylon	1.44	1.47	180	210
18	Acacia melanoxylon	0.795	0.81	120	140

## Sheet: Seedling experiment
Species	Height T1	Height T2	Height_Change	Dry Weight Shoot	Dry Weight Root	Shoot:Root
Virgilia divaricata	6.8	9.2	2.4	80	119	1.4875
Virgilia divaricata	3.3	4	0.7	14	59	4.21429
Virgilia divaricata	4.4	7	2.6	138	298	2.15942
Virgilia divaricata	3	4	1	33	50	1.51515
Virgilia divaricata	3	4.5	1.5	66	139	2.10606
Virgilia divaricata	2	2.9	0.9	79	42	0.531646
Virgilia divaricata	3	4	1	40	13	0.325
Virgilia divaricata	2.3	6	3.7	185	223	1.20541
Virgilia divaricata	3.3	4.5	1.2	63	63	1
Virgilia divaricata	3.4	8.7	5.3	101	434	4.29703
Acacia mearnsii	0	1.1	1.1	15	10	0.666667
Acacia mearnsii	0	1.1	1.1	16	9	0.5625
Acacia mearnsii	0	1.5	1.5	14	5	0.357143
Acacia mearnsii	0	1.4	1.4	17	10	0.588235
Acacia mearnsii	0.7	1	0.3	9	5	0.555556
Acacia mearnsii	0.7	1.2	0.5	21	7	0.333333
Acacia mearnsii	0.7	1.1	0.4	26	10	0.384615
Acacia mearnsii	0.7	1	0.3	13	7	0.538462
Acacia mearnsii	0	1	1	17	8	0.470588
Acacia mearnsii	0	0.7	0.7	5	3	0.6
Acacia mearnsii	0.5	0.9	0.4	20	8	0.4
Acacia mearnsii	0.6	1	0.4	2	9	4.5
Virgilia divaricata	2.5	3.9	1.4	91	108	1.18681
Acacia mearnsii	0.8	1	0.2	13	8	0.615385
Virgilia divaricata	0	8.4	8.4	190	254	1.33684
Virgilia divaricata	0	7	7	142	425	2.99296
Acacia mearnsii	0.7	1.2	0.5	24	13	0.541667
Acacia mearnsii	0.5	1	0.5	13	6	0.461538
Virgilia divaricata	0.7	2.8	2.1	83	153	1.84337
Virgilia divaricata	0	5.5	5.5	148	204	1.37838
Acacia mearnsii	1	1.2	0.2	10	11	1.1
Virgilia divaricata	1.7	5.5	3.8	149	130	0.872483
Acacia mearnsii	0.6	1	0.4	18	9	0.5
Virgilia divaricata	0	5.2	5.2	98	403	4.11224
Virgilia divaricata	2.3	4.7	2.4	85	142	1.67059
Virgilia divaricata	4	6.5	2.5	128	155	1.21094
Virgilia divaricata	3.6	5.8	2.2	106	146	1.37736
Virgilia divaricata	4.1	6.7	2.6	92	258	2.80435
Acacia mearnsii	0.8	0.9	0.1	13	13	1
Acacia mearnsii	0.9	1.3	0.4	8	5	0.625
Acacia mearnsii	0	0.8	0.8	15	8	0.533333
Acacia mearnsii	0.7	0.9	0.2	17	14	0.823529
Acacia mearnsii	0.7	0.8	0.1	20	12	0.6
Acacia mearnsii	0.7	1.2	0.5	23	11	0.478261
Acacia mearnsii	0.5	0.8	0.3	9	10	1.11111
Acacia mearnsii	0.4	0.9	0.5	19	8	0.421053
Acacia mearnsii	1.1	1.3	0.2	16	9	0.5625
Virgilia divaricata	2.3	3.7	1.4	68	95	1.39706
Acacia mearnsii	0.7	0.9	0.2	16	11	0.6875
Virgilia divaricata	0	5	5	114	331	2.90351
Acacia mearnsii	0	1.3	1.3	14	8	0.571429
Virgilia divaricata	2.7	3.4	0.7	59	106	1.79661
Acacia mearnsii	0.7	1.2	0.5	18	11	0.611111
Acacia mearnsii	0.9	1.4	0.5	1	2	2
Acacia mearnsii	0.7	1.2	0.5	14	9	0.642857
Virgilia divaricata	0	1.9	1.9	5	5	1
Acacia mearnsii	0	1	1	13	6	0.461538
Acacia mearnsii	1	1.1	0.1	18	9	0.5
Acacia mearnsii	1	1.5	0.5	9	7	0.777778
Virgilia divaricata	2.8	5.1	2.3	100	171	1.71
Virgilia divaricata	3.6	7.5	3.9	242	179	0.739669
Virgilia divaricata	2.8	7.3	4.5	197	135	0.685279
Virgilia divaricata	2.5	7	4.5	132	107	0.810606
Virgilia divaricata	3.6	7.2	3.6	161	220	1.36646
Virgilia divaricata	1.5	5.5	4	102	117	1.14706
Virgilia divaricata	0	4.5	4.5	94	68	0.723404
Virgilia divaricata	2.5	6	3.5	141	110	0.780142
Virgilia divaricata	2.6	7	4.4	170	226	1.32941
Virgilia divaricata	2	2.4	0.4	22	59	2.68182
Virgilia divaricata	3	7.5	4.5	163	163	1
Acacia mearnsii	0.7	0.9	0.2	12	7	0.583333
Acacia mearnsii	0.7	1	0.3	21	11	0.52381
Acacia mearnsii	1	1.1	0.1	17	8	0.470588
Acacia mearnsii	0	1.1	1.1	13	10	0.769231
Acacia mearnsii	0	1.2	1.2	6	5	0.833333
Acacia mearnsii	1	1.1	0.1	16	9	0.5625
Acacia mearnsii	0	0.9	0.9	6	4	0.666667
Acacia mearnsii	0	1	1	15	8	0.533333
Acacia mearnsii	1.2	1.4	0.2	11	10	0.909091
Acacia mearnsii	0.8	1.1	0.3	29	14	0.482759
Acacia mearnsii	0	1	1	9	5	0.555556
Acacia mearnsii	0.6	0.8	0.2	7	4	0.571429
Acacia mearnsii	0	0.7	0.7	8	4	0.5
Acacia mearnsii	0.7	0.8	0.1	16	14	0.875
Acacia mearnsii	0.7	1.1	0.4	18	7	0.388889
Acacia mearnsii	0.5	1.1	0.6	11	5	0.454545
Acacia mearnsii	0	1.1	1.1	13	10	0.769231
Acacia mearnsii	0.8	1.3	0.5	14	8	0.571429
Acacia mearnsii	0.7	0.8	0.1	9	7	0.777778
Acacia mearnsii	0.7	1.2	0.5	18	3	0.166667
Virgilia divaricata	3.1	4.7	1.6	54	51	0.944444
Acacia mearnsii	0.5	0.9	0.4	21	8	0.380952
Virgilia divaricata	3.7	5.6	1.9	55	128	2.32727
Acacia mearnsii	0.7	0.8	0.1	5	6	1.2
Acacia mearnsii	0.5	0.8	0.3	13	8	0.615385
Virgilia divaricata	3.5	5.4	1.9	129	49	0.379845
Acacia mearnsii	0.8	0.9	0.1	16	7	0.4375
Virgilia divaricata	2.3	5	2.7	94	98	1.04255
Virgilia divaricata	0	6.4	6.4	106	273	2.57547
Acacia mearnsii	0.8	1	0.2	8	2	0.25
Acacia mearnsii	0.7	1.2	0.5	17	8	0.470588
Acacia mearnsii	1	1.1	0.1	15	13	0.866667
Acacia mearnsii	0.9	1	0.1	23	13	0.565217
Acacia mearnsii	0.6	0.7	0.1	11	15	1.36364
Acacia mearnsii	0.7	1	0.3	15	11	0.733333
Acacia mearnsii	0.7	0.9	0.2	7	5	0.714286
Acacia mearnsii	0.7	0.8	0.1	20	13	0.65
Virgilia divaricata	3.1	4.8	1.7	74	128	1.72973
Acacia mearnsii	0	1	1	11	4	0.363636
Acacia mearnsii	0.7	0.9	0.2	16	11	0.6875
Acacia mearnsii	0.7	1.3	0.6	18	13	0.722222
Virgilia divaricata	2.9	4.6	1.7	56	62	1.10714
Virgilia divaricata	2.4	2.6	0.2	9	13	1.44444
Virgilia divaricata	1	2	1	36	51	1.41667
Virgilia divaricata	2.3	4.4	2.1	33	29	0.878788
Virgilia divaricata	3.2	5.4	2.2	85	100	1.17647
Acacia mearnsii	0.5	0.6	0.1	31	6	0.193548
Acacia mearnsii	0	0.8	0.8	18	13	0.722222
Virgilia divaricata	2.7	7	4.3	134	122	0.910448
Virgilia divaricata	1.9	5.8	3.9	173	202	1.16763
Virgilia divaricata	2.9	8.2	5.3	113	162	1.43363
Virgilia divaricata	0	5.4	5.4	155	294	1.89677
Virgilia divaricata	2.8	6.5	3.7	152	302	1.98684
Virgilia divaricata	4	8.5	4.5	128	169	1.32031
Virgilia divaricata	3	7.4	4.4	105	157	1.49524
Virgilia divaricata	3.6	6.2	2.6	137	168	1.22628
Virgilia divaricata	3.3	3.4	0.1	20	13	0.65
Acacia mearnsii	0	1	1	19	8	0.421053
Virgilia divaricata	2.7	5.2	2.5	15	56	3.73333
Virgilia divaricata	3.4	9.8	6.4	255	142	0.556863
Virgilia divaricata	3.7	0	-3.7	12	62	5.16667
Virgilia divaricata	2.2	3.4	1.2	11	9	0.818182
Virgilia divaricata	2	2.3	0.3	7	7	1
Virgilia divaricata	2.4	4.8	2.4	69	44	0.637681
Virgilia divaricata	3	7.5	4.5	103	184	1.78641
Virgilia divaricata	2	6.2	4.2	142	119	0.838028
Acacia mearnsii	0	0.7	0.7	5	5	1
Acacia mearnsii	0	0.7	0.7	5	3	0.6
Acacia mearnsii	0.5	0.8	0.3	22	11	0.5
Acacia mearnsii	0.4	0.7	0.3	12	7	0.583333
Acacia mearnsii	0.7	1	0.3	16	9	0.5625
Acacia mearnsii	0.7	0.9	0.2	26	9	0.346154
Acacia mearnsii	0.5	0.9	0.4	20	6	0.3
Acacia mearnsii	0.5	0.7	0.2	18	7	0.388889
Acacia mearnsii	0.6	0.9	0.3	22	16	0.727273
Acacia mearnsii	0.5	1.1	0.6	21	10	0.47619
Acacia mearnsii	0.5	1	0.5	24	12	0.5
Acacia mearnsii	0	0.8	0.8	22	12	0.545455
Acacia mearnsii	0.3	0.6	0.3	28	12	0.428571
Acacia mearnsii	0.5	0.6	0.1	17	12	0.705882
Virgilia divaricata	3	6.2	3.2	181	103	0.569061
Virgilia divaricata	3.1	3.8	0.7	46	49	1.06522
Virgilia divaricata	0.7	1.1	0.4	18	17	0.944444
Virgilia divaricata	4.2	5.3	1.1	22	38	1.72727
Acacia mearnsii	0.4	0.6	0.2	16	11	0.6875
Acacia mearnsii	0.4	1	0.6	26	11	0.423077
Acacia mearnsii	0.5	0.7	0.2	12	9	0.75
Virgilia divaricata	3.4	7	3.6	101	250	2.47525
Virgilia divaricata	3.4	6.7	3.3	128	179	1.39844
Virgilia divaricata	2.8	4.8	2	73	195	2.67123
Virgilia divaricata	3	6	3	125	249	1.992
Virgilia divaricata	3.2	5.8	2.6	114	157	1.37719
Virgilia divaricata	3.2	4	0.8	73	80	1.09589
Virgilia divaricata	2.4	2.5	0.1	33	95	2.87879
Virgilia divaricata	0	6.5	6.5	103	136	1.32039
Virgilia divaricata	2.3	5.1	2.8	86	93	1.0814
Virgilia divaricata	2.5	5.1	2.6	75	107	1.42667
Virgilia divaricata	2.4	4	1.6	97	79	0.814433
Acacia mearnsii	0.6	1	0.4	21	12	0.571429
Acacia mearnsii	0.6	0.7	0.1	11	6	0.545455
Acacia mearnsii	0.9	1	0.1	11	6	0.545455
Acacia mearnsii	0.4	0.6	0.2	6	3	0.5
Acacia mearnsii	0.7	1	0.3	7	2	0.285714
Acacia mearnsii	0.2	0.9	0.7	15	9	0.6
Acacia mearnsii	1	1.1	0.1	17	12	0.705882
Acacia mearnsii	0.8	1	0.2	13	8	0.615385
Acacia mearnsii	0.7	1	0.3	10	8	0.8
Virgilia divaricata	3.4	5	1.6	114	90	0.789474
Virgilia divaricata	3.3	5.9	2.6	139	82	0.589928
Acacia mearnsii	0.5	0.9	0.4	19	7	0.368421
Acacia mearnsii	0.6	0.9	0.3	20	8	0.4
Virgilia divaricata	2.3	7	4.7	158	221	1.39873
Virgilia divaricata	0	3.6	3.6	19	27	1.42105
Virgilia divaricata	0	5	5	115	100	0.869565
Virgilia divaricata	3.8	6.5	2.7	126	121	0.960317
Virgilia divaricata	3.1	5.1	2	99	60	0.606061
Virgilia divaricata	3.1	6.2	3.1	139	69	0.496403
Virgilia divaricata	4	7.7	3.7	187	140	0.748663
Virgilia divaricata	3.2	7.6	4.4	128	149	1.16406
Virgilia divaricata	2.7	3.2	0.5	45	84	1.86667
Virgilia divaricata	3.2	4	0.8	50	96	1.92
Virgilia divaricata	3.7	8	4.3	141	127	0.900709
Virgilia divaricata	1.9	3.8	1.9	84	75	0.892857
Acacia mearnsii	0	0.9	0.9	13	12	0.923077
Acacia mearnsii	0.4	0.6	0.2	18	9	0.5
Acacia mearnsii	0	0.8	0.8	18	12	0.666667
Acacia mearnsii	0	1	1	16	5	0.3125
Acacia mearnsii	0.6	0.7	0.1	18	10	0.555556
Acacia mearnsii	0.7	0.8	0.1	13	3	0.230769
Acacia mearnsii	1.2	1.3	0.1	11	9	0.818182
Virgilia divaricata	3	3.2	0.2	65	165	2.53846
Acacia mearnsii	0	0.6	0.6	19	8	0.421053
Virgilia divaricata	2.6	4.2	1.6	94	63	0.670213
Acacia mearnsii	0	0.5	0.5	4	2	0.5
Acacia mearnsii	0	0.7	0.7	15	8	0.533333
Virgilia divaricata	1.2	5.6	4.4	167	88	0.526946

## Sheet: UnpublData_PostfireSeedlingDens
PlotNo.	Species	Soil Depth class	Remaining Seed bank (no. of seed)	Post-fire Seedling count	Original seedbank (no. of seed)
1	Amea	Shallow	3	16	19
2	Amea	Shallow	2	40	42
3	Amea	Shallow	7	12	19
4	Amea	Shallow	1	5	6
5	Amea	Shallow	30	23	53
6	Amea	Shallow	5	34	39
7	Amea	Shallow	22	6	28
8	Amea	Shallow	9	98	107
9	Amea	Shallow	25	88	113
10	Amea	Shallow	8	71	79
11	Amea	Shallow	3	23	26
12	Amea	Shallow	3	70	73
13	Amea	Shallow	9	43	52
14	Amea	Shallow	6	41	47
15	Amea	Shallow	5	53	58
1	Amea	Deep	1	16	17
2	Amea	Deep	1	40	41
3	Amea	Deep	8	12	20
4	Amea	Deep	9	5	14
5	Amea	Deep	4	23	27
6	Amea	Deep	7	34	41
7	Amea	Deep	11	6	17
8	Amea	Deep	12	98	110
9	Amea	Deep	9	88	97
10	Amea	Deep	23	71	94
11	Amea	Deep	2	23	25
12	Amea	Deep	5	70	75
13	Amea	Deep	10	43	53
14	Amea	Deep	17	41	58
15	Amea	Deep	16	53	69
1	Vdiv	Shallow	2	23	25
2	Vdiv	Shallow	0	32	32
3	Vdiv	Shallow	0	42	42
4	Vdiv	Shallow	1	30	31
5	Vdiv	Shallow	8	3	11
6	Vdiv	Shallow	7	18	25
7	Vdiv	Shallow	22	13	35
8	Vdiv	Shallow	5	23	28
9	Vdiv	Shallow	9	21	30
10	Vdiv	Shallow	3	22	25
11	Vdiv	Shallow	2	52	54
12	Vdiv	Shallow	1	16	17
13	Vdiv	Shallow	2	27	29
14	Vdiv	Shallow	0	4	4
15	Vdiv	Shallow	2	270	272
1	Vdiv	Deep	3	23	26
2	Vdiv	Deep	0	32	32
3	Vdiv	Deep	4	42	46
4	Vdiv	Deep	2	30	32
5	Vdiv	Deep	1	3	4
6	Vdiv	Deep	16	18	34
7	Vdiv	Deep	7	13	20
8	Vdiv	Deep	6	23	29
9	Vdiv	Deep	17	21	38
10	Vdiv	Deep	9	22	31
11	Vdiv	Deep	4	52	56
12	Vdiv	Deep	9	16	25
13	Vdiv	Deep	3	27	30
14	Vdiv	Deep	6	4	10
15	Vdiv	Deep	21	270	291
